# Supplementary material
Source: ML conference proceedings conference paper supplement (https://openreview.net/forum?id=jzvWwv4gMx)
Supplement: supplementary_material [file attachment]

I will provide a set of logical rules L1 to L28 and facts F1 to F63. Please select one single logical rule from L1 to L28 and a few facts from F1 to F63 to explain the following statement.

Rules:

- L1:  $\forall A, B, C : r1(B, A) \wedge r1(B, C) \wedge r44(A) \rightarrow r2(A, C)$   
 L2:  $\forall A, B, C : r1(B, A) \wedge r1(B, C) \wedge r43(A) \rightarrow r3(A, C)$   
 L3:  $\forall A, B : r1(A, B) \wedge r44(A) \rightarrow r4(A, B)$   
 L4:  $\forall A, B : r1(A, B) \wedge r43(A) \rightarrow r5(A, B)$   
 L5:  $\forall A, B, C : r1(A, B) \wedge r1(B, C) \wedge r44(A) \rightarrow r6(A, C)$   
 L6:  $\forall A, B, C : r1(A, B) \wedge r1(B, C) \wedge r43(A) \rightarrow r7(A, C)$   
 L7:  $\forall A, B, C, D : r1(A, B) \wedge r1(B, C) \wedge r1(C, D) \wedge r44(A) \rightarrow r8(A, D)$   
 L8:  $\forall A, B, C, D : r1(A, B) \wedge r1(B, C) \wedge r1(C, D) \wedge r43(A) \rightarrow r9(A, D)$   
 L9:  $\forall A, B, C, D : r1(B, A) \wedge r1(B, C) \wedge r1(C, D) \wedge r44(A) \rightarrow r10(A, D)$   
 L10:  $\forall A, B, C, D : r1(B, A) \wedge r1(B, C) \wedge r1(C, D) \wedge r43(A) \rightarrow r11(A, D)$   
 L11:  $\forall A, B, C, D, E : r1(B, A) \wedge r1(B, C) \wedge r1(C, D) \wedge r1(D, E) \wedge r44(A) \rightarrow r12(A, E)$   
 L12:  $\forall A, B, C, D, E : r1(B, A) \wedge r1(B, C) \wedge r1(C, D) \wedge r1(D, E) \wedge r43(A) \rightarrow r13(A, E)$   
 L13:  $\forall A, B, C, D, E, F : r1(B, A) \wedge r1(C, B) \wedge r1(C, D) \wedge r1(D, E) \wedge r1(E, F) \wedge r44(A) \rightarrow r14(A, F)$   
 L14:  $\forall A, B, C, D, E, F : r1(B, A) \wedge r1(C, B) \wedge r1(C, D) \wedge r1(D, E) \wedge r1(E, F) \wedge r43(A) \rightarrow r15(A, F)$   
 L15:  $\forall A, B, C, D, E : r1(B, A) \wedge r1(C, B) \wedge r1(C, D) \wedge r1(D, E) \wedge r44(A) \rightarrow r16(A, E)$   
 L16:  $\forall A, B, C, D, E : r1(B, A) \wedge r1(C, B) \wedge r1(C, D) \wedge r1(D, E) \wedge r43(A) \rightarrow r17(A, E)$   
 L17:  $\forall A, B, C, D, E, F, G : r1(B, A) \wedge r1(C, B) \wedge r1(D, C) \wedge r1(D, E) \wedge r1(E, F) \wedge r1(F, G) \wedge r44(A) \rightarrow r18(A, G)$   
 L18:  $\forall A, B, C, D, E, F, G : r1(B, A) \wedge r1(C, B) \wedge r1(D, C) \wedge r1(D, E) \wedge r1(E, F) \wedge r1(F, G) \wedge r43(A) \rightarrow r19(A, G)$   
 L19:  $\forall A, B, C, D, E, F : r1(B, A) \wedge r1(C, B) \wedge r1(D, C) \wedge r1(D, E) \wedge r1(E, F) \wedge r44(A) \rightarrow r20(A, F)$   
 L20:  $\forall A, B, C, D, E, F : r1(B, A) \wedge r1(C, B) \wedge r1(D, C) \wedge r1(D, E) \wedge r1(E, F) \wedge r43(A) \rightarrow r21(A, F)$   
 L21:  $\forall A, B : r1(B, A) \wedge r44(A) \rightarrow r22(A, B)$   
 L22:  $\forall A, B : r1(B, A) \wedge r43(A) \rightarrow r23(A, B)$   
 L23:  $\forall A, B, C : r1(B, A) \wedge r1(C, B) \wedge r44(A) \rightarrow r24(A, C)$   
 L24:  $\forall A, B, C : r1(B, A) \wedge r1(C, B) \wedge r43(A) \rightarrow r25(A, C)$   
 L25:  $\forall A, B, C, D : r1(B, A) \wedge r1(C, B) \wedge r1(D, C) \wedge r44(A) \rightarrow r26(A, D)$

L26:  $\forall A, B, C, D : r1(B, A) \wedge r1(C, B) \wedge r1(D, C) \wedge r43(A) \rightarrow r27(A, D)$

L27:  $\forall A, B, C, D : r1(B, A) \wedge r1(C, B) \wedge r1(C, D) \wedge r44(A) \rightarrow r28(A, D)$

L28:  $\forall A, B, C, D : r1(B, A) \wedge r1(C, B) \wedge r1(C, D) \wedge r43(A) \rightarrow r29(A, D)$

Facts:

F1:  $r1(\text{Laura}, \text{Fabian})$

F2:  $r1(\text{Laura}, \text{Felix})$

F3:  $r1(\text{Laura}, \text{Claudia})$

F4:  $r1(\text{Elias}, \text{Fabian})$

F5:  $r1(\text{Elias}, \text{Felix})$

F6:  $r1(\text{Elias}, \text{Claudia})$

F7:  $r1(\text{Alina}, \text{David})$

F8:  $r1(\text{Alina}, \text{Lea})$

F9:  $r1(\text{Nico}, \text{David})$

F10:  $r1(\text{Nico}, \text{Lea})$

F11:  $r1(\text{Emily}, \text{Nico})$

F12:  $r1(\text{Konstantin}, \text{Nico})$

F13:  $r1(\text{Fabian}, \text{Thomas})$

F14:  $r1(\text{Fabian}, \text{Amelie})$

F15:  $r1(\text{Nina}, \text{Tobias})$

F16:  $r1(\text{Leonie}, \text{Emily})$

F17:  $r1(\text{Stefan}, \text{Emily})$

F18:  $r1(\text{Gabriel}, \text{Tobias})$

F19:  $r1(\text{Elena}, \text{Thomas})$

F20:  $r1(\text{Elena}, \text{Amelie})$

F21:  $r1(\text{Thomas}, \text{Helga})$

F22:  $r1(\text{Thomas}, \text{Nina})$

F23:  $r1(\text{Thomas}, \text{Patrick})$

F24:  $r1(\text{Luisa}, \text{Helga})$

F25:  $r1(\text{Luisa}, \text{Nina})$

F26:  $r1(\text{Luisa}, \text{Patrick})$

F27:  $r1(\text{Patrick}, \text{Samuel})$

F28:  $r1(\text{Patrick}, \text{Alina})$

F29:  $r1(\text{Patrick}, \text{Jonathan})$

F30:  $r1(\text{Patrick}, \text{Philipp})$

F31:  $r1(\text{Patrick}, \text{Florian})$

F32:  $r1(\text{Emilia}, \text{Samuel})$   
 F33:  $r1(\text{Emilia}, \text{Alina})$   
 F34:  $r1(\text{Emilia}, \text{Jonathan})$   
 F35:  $r1(\text{Emilia}, \text{Philipp})$   
 F36:  $r1(\text{Emilia}, \text{Florian})$   
 F37:  $r44(\text{Laura})$   
 F38:  $r43(\text{Elias})$   
 F39:  $r43(\text{Fabian})$   
 F40:  $r44(\text{Claudia})$   
 F41:  $r44(\text{Elena})$   
 F42:  $r43(\text{Thomas})$   
 F43:  $r44(\text{Amelie})$   
 F44:  $r44(\text{Luisa})$   
 F45:  $r43(\text{Patrick})$   
 F46:  $r44(\text{Emilia})$   
 F47:  $r43(\text{Samuel})$   
 F48:  $r44(\text{Alina})$   
 F49:  $r43(\text{Jonathan})$   
 F50:  $r43(\text{Philipp})$   
 F51:  $r43(\text{Nico})$   
 F52:  $r43(\text{David})$   
 F53:  $r44(\text{Emily})$   
 F54:  $r43(\text{Konstantin})$   
 F55:  $r43(\text{Florian})$   
 F56:  $r44(\text{Helga})$   
 F57:  $r44(\text{Nina})$   
 F58:  $r44(\text{Lea})$   
 F59:  $r43(\text{Felix})$   
 F60:  $r44(\text{Leonie})$   
 F61:  $r43(\text{Stefan})$   
 F62:  $r43(\text{Gabriel})$   
 F63:  $r43(\text{Tobias})$

Statement:  $r3(\text{Philipp}, \text{Jonathan})$

Answer with the numbers of the selected rule and facts. The selected rule and facts are (There may be multiple explanations for the statement, please provide one):
