# Supplementary material
Source: ML conference proceedings conference paper supplement (https://openreview.net/forum?id=jzvWwv4gMx)
Supplement: supplementary_material [file attachment]

I will give you a set of facts F1 to F94, facts G1 to G5 and a template for a logical rule. Please generate one single rule to match the template and logically entail the facts G1 to G5 based on facts F1 to F94.

F1: *r1*(moritz, natalie).

F2: *r45*(natalie, moritz).

F3: *r1*(moritz, sophie).

F4: *r45*(sophie, moritz).

F5: *r1*(valerie, natalie).

F6: *r45*(natalie, valerie).

F7: *r1*(valerie, sophie).

F8: *r45*(sophie, valerie).

F9: *r1*(katharina, victoria).

F10: *r45*(victoria, katharina).

F11: *r1*(katharina, benjamin).

F12: *r45*(benjamin, katharina).

F13: *r1*(david, theodor).

F14: *r45*(theodor, david).

F15: *r1*(david, helga).

F16: *r45*(helga, david).

F17: *r1*(david, patrick).

F18: *r45*(patrick, david).

F19: *r1*(theodor, fabian).

F20: *r45*(fabian, theodor).

F21: *r1*(patrick, tobias).

F22: *r45*(tobias, patrick).

F23: *r1*(emily, fabian).

F24: *r45*(fabian, emily).

F25: *r1*(vanessa, tobias).

F26: *r45*(tobias, vanessa).

F27: *r1*(natalie, theodor).

F28: *r45*(theodor, natalie).

F29: *r1*(natalie, helga).

F30: *r45*(helga, natalie).

F31: *r1*(natalie, patrick).

F32: *r45*(patrick, natalie).

F33:  $r1(\text{noah}, \text{victoria})$ .  
F34:  $r45(\text{victoria}, \text{noah})$ .  
F35:  $r1(\text{noah}, \text{benjamin})$ .  
F36:  $r45(\text{benjamin}, \text{noah})$ .  
F37:  $r1(\text{olivia}, \text{moritz})$ .  
F38:  $r45(\text{moritz}, \text{olivia})$ .  
F39:  $r1(\text{stefan}, \text{moritz})$ .  
F40:  $r45(\text{moritz}, \text{stefan})$ .  
F41:  $r1(\text{sophie}, \text{marie})$ .  
F42:  $r45(\text{marie}, \text{sophie})$ .  
F43:  $r1(\text{sophie}, \text{jonas})$ .  
F44:  $r45(\text{jonas}, \text{sophie})$ .  
F45:  $r1(\text{oliver}, \text{marie})$ .  
F46:  $r45(\text{marie}, \text{oliver})$ .  
F47:  $r1(\text{oliver}, \text{jonas})$ .  
F48:  $r45(\text{jonas}, \text{oliver})$ .  
F49:  $r1(\text{jonas}, \text{katharina})$ .  
F50:  $r45(\text{katharina}, \text{jonas})$ .  
F51:  $r1(\text{jonas}, \text{vincent})$ .  
F52:  $r45(\text{vincent}, \text{jonas})$ .  
F53:  $r1(\text{jonas}, \text{amelie})$ .  
F54:  $r45(\text{amelie}, \text{jonas})$ .  
F55:  $r1(\text{jonas}, \text{larissa})$ .  
F56:  $r45(\text{larissa}, \text{jonas})$ .  
F57:  $r1(\text{jonas}, \text{sebastian})$ .  
F58:  $r45(\text{sebastian}, \text{jonas})$ .  
F59:  $r1(\text{emilia}, \text{katharina})$ .  
F60:  $r45(\text{katharina}, \text{emilia})$ .  
F61:  $r1(\text{emilia}, \text{vincent})$ .  
F62:  $r45(\text{vincent}, \text{emilia})$ .  
F63:  $r1(\text{emilia}, \text{amelie})$ .  
F64:  $r45(\text{amelie}, \text{emilia})$ .  
F65:  $r1(\text{emilia}, \text{larissa})$ .  
F66:  $r45(\text{larissa}, \text{emilia})$ .  
F67:  $r1(\text{emilia}, \text{sebastian})$ .

F68:  $r45(\text{sebastian}, \text{emilia})$ .

F69:  $r43(\text{moritz})$ .

F70:  $r44(\text{valerie})$ .

F71:  $r44(\text{natalie})$ .

F72:  $r44(\text{olivia})$ .

F73:  $r43(\text{stefan})$ .

F74:  $r44(\text{sophie})$ .

F75:  $r43(\text{oliver})$ .

F76:  $r43(\text{jonas})$ .

F77:  $r44(\text{emilia})$ .

F78:  $r43(\text{sebastian})$ .

F79:  $r44(\text{katharina})$ .

F80:  $r43(\text{vincent})$ .

F81:  $r43(\text{david})$ .

F82:  $r43(\text{theodor})$ .

F83:  $r44(\text{helga})$ .

F84:  $r43(\text{patrick})$ .

F85:  $r44(\text{emily})$ .

F86:  $r43(\text{fabian})$ .

F87:  $r44(\text{vanessa})$ .

F88:  $r43(\text{tobias})$ .

F89:  $r43(\text{noah})$ .

F90:  $r44(\text{victoria})$ .

F91:  $r43(\text{benjamin})$ .

F92:  $r44(\text{marie})$ .

F93:  $r44(\text{amelie})$ .

F94:  $r44(\text{larissa})$ .

G1:  $r16(\text{helga}, \text{marie})$

G2:  $r16(\text{helga}, \text{jonas})$

G3:  $r16(\text{marie}, \text{theodor})$

G4:  $r16(\text{marie}, \text{helga})$

G5:  $r16(\text{marie}, \text{patrick})$

Template:  $\forall A, B, C, D, E : \#\#(A, B) \wedge \#\#(B, C) \wedge \#\#(C, D) \wedge \#\#(D, E) \wedge + +$   
 $(A) \rightarrow r16(A, E)$

Note that the symbol ‘##’ in the template should be filled with either ‘r1’ or ‘r45’, while the symbol ‘++’ should be filled with either ‘r43’ or ‘r44’. After filling in the template, the generated rule is:
