# Supplementary material
Source: ML conference proceedings conference paper supplement (https://openreview.net/forum?id=jzvWwv4gMx)
Supplement: supplementary_material [file attachment]

I will give you a set of facts F1 to F86, facts G1 to G1 and a template for a logical rule. Please generate one single rule to match the template and logically entail the facts G1 to G1 based on facts F1 to F86.

Facts:

F1:  $r1(\text{florian}, \text{julia})$ .

F2:  $r45(\text{julia}, \text{florian})$ .

F3:  $r1(\text{victoria}, \text{florian})$ .

F4:  $r45(\text{florian}, \text{victoria})$ .

F5:  $r1(\text{victoria}, \text{maximilian})$ .

F6:  $r45(\text{maximilian}, \text{victoria})$ .

F7:  $r1(\text{victoria}, \text{elena})$ .

F8:  $r45(\text{elena}, \text{victoria})$ .

F9:  $r1(\text{emilia}, \text{nora})$ .

F10:  $r45(\text{nora}, \text{emilia})$ .

F11:  $r1(\text{jonas}, \text{nora})$ .

F12:  $r45(\text{nora}, \text{jonas})$ .

F13:  $r1(\text{dominik}, \text{larissa})$ .

F14:  $r45(\text{larissa}, \text{dominik})$ .

F15:  $r1(\text{marie}, \text{larissa})$ .

F16:  $r45(\text{larissa}, \text{marie})$ .

F17:  $r1(\text{larissa}, \text{valentin})$ .

F18:  $r45(\text{valentin}, \text{larissa})$ .

F19:  $r1(\text{maximilian}, \text{moritz})$ .

F20:  $r45(\text{moritz}, \text{maximilian})$ .

F21:  $r1(\text{luis}, \text{valentin})$ .

F22:  $r45(\text{valentin}, \text{luis})$ .

F23:  $r1(\text{vanessa}, \text{paul})$ .

F24:  $r45(\text{paul}, \text{vanessa})$ .

F25:  $r1(\text{emil}, \text{paul})$ .

F26:  $r45(\text{paul}, \text{emil})$ .

F27:  $r1(\text{adrian}, \text{florian})$ .

F28:  $r45(\text{florian}, \text{adrian})$ .

F29:  $r1(\text{adrian}, \text{maximilian})$ .

F30:  $r45(\text{maximilian}, \text{adrian})$ .

F31:  $r1(\text{adrian}, \text{elena})$ .

F32:  $r_{45}(\text{elena}, \text{adrian})$ .  
F33:  $r_1(\text{ella}, \text{moritz})$ .  
F34:  $r_{45}(\text{moritz}, \text{ella})$ .  
F35:  $r_1(\text{paula}, \text{julia})$ .  
F36:  $r_{45}(\text{julia}, \text{paula})$ .  
F37:  $r_1(\text{nora}, \text{victoria})$ .  
F38:  $r_{45}(\text{victoria}, \text{nora})$ .  
F39:  $r_1(\text{nora}, \text{dominik})$ .  
F40:  $r_{45}(\text{dominik}, \text{nora})$ .  
F41:  $r_1(\text{nora}, \text{vanessa})$ .  
F42:  $r_{45}(\text{vanessa}, \text{nora})$ .  
F43:  $r_1(\text{nora}, \text{magdalena})$ .  
F44:  $r_{45}(\text{magdalena}, \text{nora})$ .  
F45:  $r_1(\text{elias}, \text{victoria})$ .  
F46:  $r_{45}(\text{victoria}, \text{elias})$ .  
F47:  $r_1(\text{elias}, \text{dominik})$ .  
F48:  $r_{45}(\text{dominik}, \text{elias})$ .  
F49:  $r_1(\text{elias}, \text{vanessa})$ .  
F50:  $r_{45}(\text{vanessa}, \text{elias})$ .  
F51:  $r_1(\text{elias}, \text{magdalena})$ .  
F52:  $r_{45}(\text{magdalena}, \text{elias})$ .  
F53:  $r_1(\text{selina}, \text{elias})$ .  
F54:  $r_{45}(\text{elias}, \text{selina})$ .  
F55:  $r_1(\text{jonathan}, \text{elias})$ .  
F56:  $r_{45}(\text{elias}, \text{jonathan})$ .  
F57:  $r_1(\text{valentina}, \text{jonathan})$ .  
F58:  $r_{45}(\text{jonathan}, \text{valentina})$ .  
F59:  $r_1(\text{felix}, \text{jonathan})$ .  
F60:  $r_{45}(\text{jonathan}, \text{felix})$ .  
F61:  $r_{43}(\text{florian})$ .  
F62:  $r_{44}(\text{victoria})$ .  
F63:  $r_{43}(\text{adrian})$ .  
F64:  $r_{44}(\text{nora})$ .  
F65:  $r_{43}(\text{elias})$ .  
F66:  $r_{44}(\text{selina})$ .

F67:  $r43(\text{jonathan})$ .

F68:  $r44(\text{valentina})$ .

F69:  $r43(\text{felix})$ .

F70:  $r44(\text{magdalena})$ .

F71:  $r44(\text{emilia})$ .

F72:  $r43(\text{jonas})$ .

F73:  $r43(\text{dominik})$ .

F74:  $r44(\text{marie})$ .

F75:  $r44(\text{larissa})$ .

F76:  $r43(\text{maximilian})$ .

F77:  $r43(\text{luis})$ .

F78:  $r43(\text{valentin})$ .

F79:  $r44(\text{vanessa})$ .

F80:  $r43(\text{emil})$ .

F81:  $r43(\text{paul})$ .

F82:  $r44(\text{elena})$ .

F83:  $r44(\text{ella})$ .

F84:  $r43(\text{moritz})$ .

F85:  $r44(\text{paula})$ .

F86:  $r44(\text{julia})$ .

G1:  $r18(\text{julia}, \text{valentin})$

Template:  $\forall A, B, C, D, E, F, G : \#\#(A, B) \wedge \#\#(B, C) \wedge \#\#(C, D) \wedge \#\#(D, E) \wedge \#\#(E, F) \wedge \#\#(F, G) \wedge ++(A) \rightarrow r18(A, G)$

Note that the symbol ‘ $\#\#$ ’ in the template should be filled with either ‘ $r1$ ’ or ‘ $r45$ ’, while the symbol ‘ $++$ ’ should be filled with either ‘ $r43$ ’ or ‘ $r44$ ’. After filling in the template, the generated rule is:
