# Supplementary material
Source: ML conference proceedings conference paper supplement (https://openreview.net/forum?id=jzvWwv4gMx)
Supplement: supplementary_material [file attachment]

I will give you a set of facts F1 to F90, facts G1 to G9 and a template for a logical rule. Please generate one single rule to match the template and logically entail the facts G1 to G9 based on facts F1 to F90.

Facts:

F1: *r1*(lorenz, emma).

F2: *r45*(emma, lorenz).

F3: *r1*(lorenz, marie).

F4: *r45*(marie, lorenz).

F5: *r1*(lorenz, adrian).

F6: *r45*(adrian, lorenz).

F7: *r1*(lorenz, elena).

F8: *r45*(elena, lorenz).

F9: *r1*(isabella, emma).

F10: *r45*(emma, isabella).

F11: *r1*(isabella, marie).

F12: *r45*(marie, isabella).

F13: *r1*(isabella, adrian).

F14: *r45*(adrian, isabella).

F15: *r1*(isabella, elena).

F16: *r45*(elena, isabella).

F17: *r1*(leo, mia).

F18: *r45*(mia, leo).

F19: *r1*(leo, philipp).

F20: *r45*(philipp, leo).

F21: *r1*(mia, lena).

F22: *r45*(lena, mia).

F23: *r1*(laura, selina).

F24: *r45*(selina, laura).

F25: *r1*(selina, paula).

F26: *r45*(paula, selina).

F27: *r1*(valentin, paula).

F28: *r45*(paula, valentin).

F29: *r1*(dominik, lena).

F30: *r45*(lena, dominik).

F31: *r1*(emma, gertrude).

F32:  $r_{45}(\text{gertrude}, \text{emma})$ .  
F33:  $r_1(\text{emma}, \text{lukas})$ .  
F34:  $r_{45}(\text{lukas}, \text{emma})$ .  
F35:  $r_1(\text{marie}, \text{luisa})$ .  
F36:  $r_{45}(\text{luisa}, \text{marie})$ .  
F37:  $r_1(\text{marie}, \text{florian})$ .  
F38:  $r_{45}(\text{florian}, \text{marie})$ .  
F39:  $r_1(\text{marie}, \text{claudia})$ .  
F40:  $r_{45}(\text{claudia}, \text{marie})$ .  
F41:  $r_1(\text{elias}, \text{gertrude})$ .  
F42:  $r_{45}(\text{gertrude}, \text{elias})$ .  
F43:  $r_1(\text{elias}, \text{lukas})$ .  
F44:  $r_{45}(\text{lukas}, \text{elias})$ .  
F45:  $r_1(\text{helga}, \text{elias})$ .  
F46:  $r_{45}(\text{elias}, \text{helga})$ .  
F47:  $r_1(\text{jakob}, \text{elias})$ .  
F48:  $r_{45}(\text{elias}, \text{jakob})$ .  
F49:  $r_1(\text{adrian}, \text{selina})$ .  
F50:  $r_{45}(\text{selina}, \text{adrian})$ .  
F51:  $r_1(\text{christian}, \text{luisa})$ .  
F52:  $r_{45}(\text{luisa}, \text{christian})$ .  
F53:  $r_1(\text{christian}, \text{florian})$ .  
F54:  $r_{45}(\text{florian}, \text{christian})$ .  
F55:  $r_1(\text{christian}, \text{claudia})$ .  
F56:  $r_{45}(\text{claudia}, \text{christian})$ .  
F57:  $r_1(\text{florian}, \text{jonas})$ .  
F58:  $r_{45}(\text{jonas}, \text{florian})$ .  
F59:  $r_1(\text{ella}, \text{jonas})$ .  
F60:  $r_{45}(\text{jonas}, \text{ella})$ .  
F61:  $r_1(\text{claudia}, \text{mia})$ .  
F62:  $r_{45}(\text{mia}, \text{claudia})$ .  
F63:  $r_1(\text{claudia}, \text{philipp})$ .  
F64:  $r_{45}(\text{philipp}, \text{claudia})$ .  
F65:  $r_{43}(\text{lorenz})$ .  
F66:  $r_{44}(\text{isabella})$ .

F67:  $r44(\text{marie})$ .

F68:  $r43(\text{adrian})$ .

F69:  $r43(\text{christian})$ .

F70:  $r43(\text{florian})$ .

F71:  $r44(\text{ella})$ .

F72:  $r43(\text{jonas})$ .

F73:  $r44(\text{elena})$ .

F74:  $r44(\text{claudia})$ .

F75:  $r43(\text{leo})$ .

F76:  $r44(\text{mia})$ .

F77:  $r44(\text{laura})$ .

F78:  $r44(\text{selina})$ .

F79:  $r44(\text{luisa})$ .

F80:  $r43(\text{valentin})$ .

F81:  $r44(\text{paula})$ .

F82:  $r43(\text{dominik})$ .

F83:  $r44(\text{lena})$ .

F84:  $r44(\text{emma})$ .

F85:  $r43(\text{philipp})$ .

F86:  $r43(\text{elias})$ .

F87:  $r44(\text{gertrude})$ .

F88:  $r44(\text{helga})$ .

F89:  $r43(\text{jakob})$ .

F90:  $r43(\text{lukas})$ .

G1:  $r14(\text{selina}, \text{mia})$

G2:  $r14(\text{selina}, \text{philipp})$

G3:  $r14(\text{selina}, \text{jonas})$

G4:  $r14(\text{luisa}, \text{paula})$

G5:  $r14(\text{gertrude}, \text{mia})$

G6:  $r14(\text{gertrude}, \text{paula})$

G7:  $r14(\text{gertrude}, \text{philipp})$

G8:  $r14(\text{gertrude}, \text{jonas})$

G9:  $r14(\text{claudia}, \text{paula})$

Template:  $\forall A, B, C, D, E, F : \#\#(A, B) \wedge \#\#(B, C) \wedge \#\#(C, D) \wedge \#\#(D, E) \wedge \#\#(E, F) \wedge ++(A) \rightarrow r14(A, F)$

Note that the symbol ‘##’ in the template should be filled with either ‘r1’ or ‘r45’, while the symbol ‘++’ should be filled with either ‘r43’ or ‘r44’. After filling in the template, the generated rule is:
