# Supplementary material
Source: ML conference proceedings conference paper supplement (https://openreview.net/forum?id=jzvWwv4gMx)
Supplement: supplementary_material [file attachment]

I will give you a set of facts F1 to F90, facts G1 to G22 and a template for a logical rule. Please generate one single rule to match the template and logically entail the facts G1 to G22 based on facts F1 to F90.

Facts:

F1: *r1*(angelina, marcel).

F2: *r45*(marcel, angelina).

F3: *r1*(angelina, karin).

F4: *r45*(karin, angelina).

F5: *r1*(luca, marcel).

F6: *r45*(marcel, luca).

F7: *r1*(luca, karin).

F8: *r45*(karin, luca).

F9: *r1*(lara, valentina).

F10: *r45*(valentina, lara).

F11: *r1*(lara, charlotte).

F12: *r45*(charlotte, lara).

F13: *r1*(oskar, valentina).

F14: *r45*(valentina, oskar).

F15: *r1*(oskar, charlotte).

F16: *r45*(charlotte, oskar).

F17: *r1*(konstantin, lena).

F18: *r45*(lena, konstantin).

F19: *r1*(anna, oskar).

F20: *r45*(oskar, anna).

F21: *r1*(samuel, oskar).

F22: *r45*(oskar, samuel).

F23: *r1*(marcel, lara).

F24: *r45*(lara, marcel).

F25: *r1*(marcel, anastasia).

F26: *r45*(anastasia, marcel).

F27: *r1*(marcel, valerie).

F28: *r45*(valerie, marcel).

F29: *r1*(emilia, samuel).

F30: *r45*(samuel, emilia).

F31: *r1*(emilia, lisa).

F32:  $r45(lisa, emilia)$ .  
F33:  $r1(moritz, samuel)$ .  
F34:  $r45(samuel, moritz)$ .  
F35:  $r1(moritz, lisa)$ .  
F36:  $r45(lisa, moritz)$ .  
F37:  $r1(olivia, emilia)$ .  
F38:  $r45(emilia, olivia)$ .  
F39:  $r1(valentin, emilia)$ .  
F40:  $r45(emilia, valentin)$ .  
F41:  $r1(paula, lara)$ .  
F42:  $r45(lara, paula)$ .  
F43:  $r1(paula, anastasia)$ .  
F44:  $r45(anastasia, paula)$ .  
F45:  $r1(paula, valerie)$ .  
F46:  $r45(valerie, paula)$ .  
F47:  $r1(karin, daniel)$ .  
F48:  $r45(daniel, karin)$ .  
F49:  $r1(karin, leon)$ .  
F50:  $r45(leon, karin)$ .  
F51:  $r1(karin, beate)$ .  
F52:  $r45(beate, karin)$ .  
F53:  $r1(emma, angelina)$ .  
F54:  $r45(angelina, emma)$ .  
F55:  $r1(leo, angelina)$ .  
F56:  $r45(angelina, leo)$ .  
F57:  $r1(oliver, daniel)$ .  
F58:  $r45(daniel, oliver)$ .  
F59:  $r1(oliver, leon)$ .  
F60:  $r45(leon, oliver)$ .  
F61:  $r1(oliver, beate)$ .  
F62:  $r45(beate, oliver)$ .  
F63:  $r1(beate, lena)$ .  
F64:  $r45(lena, beate)$ .  
F65:  $r44(angelina)$ .  
F66:  $r43(luca)$ .

F67:  $r_{43}(\text{marcel})$ .  
 F68:  $r_{44}(\text{paula})$ .  
 F69:  $r_{44}(\text{valerie})$ .  
 F70:  $r_{44}(\text{karin})$ .  
 F71:  $r_{44}(\text{emma})$ .  
 F72:  $r_{43}(\text{leo})$ .  
 F73:  $r_{43}(\text{oliver})$ .  
 F74:  $r_{44}(\text{beate})$ .  
 F75:  $r_{43}(\text{daniel})$ .  
 F76:  $r_{43}(\text{leon})$ .  
 F77:  $r_{44}(\text{lara})$ .  
 F78:  $r_{43}(\text{oskar})$ .  
 F79:  $r_{44}(\text{valentina})$ .  
 F80:  $r_{43}(\text{konstantin})$ .  
 F81:  $r_{44}(\text{lena})$ .  
 F82:  $r_{44}(\text{anna})$ .  
 F83:  $r_{43}(\text{samuel})$ .  
 F84:  $r_{44}(\text{anastasia})$ .  
 F85:  $r_{44}(\text{emilia})$ .  
 F86:  $r_{43}(\text{moritz})$ .  
 F87:  $r_{44}(\text{charlotte})$ .  
 F88:  $r_{44}(\text{olivia})$ .  
 F89:  $r_{43}(\text{valentin})$ .  
 F90:  $r_{44}(\text{lisa})$ .  
 G1:  $r_{22}(\text{angelina}, \text{emma})$   
 G2:  $r_{22}(\text{angelina}, \text{leo})$   
 G3:  $r_{22}(\text{lara}, \text{marcel})$   
 G4:  $r_{22}(\text{lara}, \text{paula})$   
 G5:  $r_{22}(\text{valentina}, \text{lara})$   
 G6:  $r_{22}(\text{valentina}, \text{oskar})$   
 G7:  $r_{22}(\text{lena}, \text{konstantin})$   
 G8:  $r_{22}(\text{lena}, \text{beate})$   
 G9:  $r_{22}(\text{anastasia}, \text{marcel})$   
 G10:  $r_{22}(\text{anastasia}, \text{paula})$   
 G11:  $r_{22}(\text{emilia}, \text{olivia})$

G12:  $r22(\text{emilia}, \text{valentin})$

G13:  $r22(\text{charlotte}, \text{lara})$

G14:  $r22(\text{charlotte}, \text{oskar})$

G15:  $r22(\text{lisa}, \text{emilia})$

G16:  $r22(\text{lisa}, \text{moritz})$

G17:  $r22(\text{valerie}, \text{marcel})$

G18:  $r22(\text{valerie}, \text{paula})$

G19:  $r22(\text{karin}, \text{angelina})$

G20:  $r22(\text{karin}, \text{luca})$

G21:  $r22(\text{beate}, \text{karin})$

G22:  $r22(\text{beate}, \text{oliver})$

Template:  $\forall A, B : \#\#(A, B) \wedge ++(A) \rightarrow r22(A, B)$

Note that the symbol ‘ $\#\#$ ’ in the template should be filled with either ‘r1’ or ‘r45’, while the symbol ‘ $++$ ’ should be filled with either ‘r43’ or ‘r44’. After filling in the template, the generated rule is:
