# Supplementary material
Source: ML conference proceedings conference paper supplement (https://openreview.net/forum?id=jzvWwv4gMx)
Supplement: supplementary_material [file attachment]

I will give you a set of facts F1 to F91, facts G1 to G2 and a template for a logical rule. Please generate one single rule to match the template and logically entail the facts G1 to G2 based on facts F1 to F91.

F1: *r1*(angelina, michael).  
F2: *r45*(michael, angelina).  
F3: *r1*(angelina, jan).  
F4: *r45*(jan, angelina).  
F5: *r1*(angelina, jonathan).  
F6: *r45*(jonathan, angelina).  
F7: *r1*(emily, katharina).  
F8: *r45*(katharina, emily).  
F9: *r1*(emily, adam).  
F10: *r45*(adam, emily).  
F11: *r1*(nora, theodor).  
F12: *r45*(theodor, nora).  
F13: *r1*(jan, lea).  
F14: *r45*(lea, jan).  
F15: *r1*(magdalena, angelina).  
F16: *r45*(angelina, magdalena).  
F17: *r1*(matthias, angelina).  
F18: *r45*(angelina, matthias).  
F19: *r1*(nico, sebastian).  
F20: *r45*(sebastian, nico).  
F21: *r1*(claudia, sebastian).  
F22: *r45*(sebastian, claudia).  
F23: *r1*(emil, michael).  
F24: *r45*(michael, emil).  
F25: *r1*(emil, jan).  
F26: *r45*(jan, emil).  
F27: *r1*(emil, jonathan).  
F28: *r45*(jonathan, emil).  
F29: *r1*(alina, lea).  
F30: *r45*(lea, alina).  
F31: *r1*(patrick, theodor).  
F32: *r45*(theodor, patrick).

F33:  $r1(\text{theodor}, \text{leon})$ .  
F34:  $r45(\text{leon}, \text{theodor})$ .  
F35:  $r1(\text{vanessa}, \text{leon})$ .  
F36:  $r45(\text{leon}, \text{vanessa})$ .  
F37:  $r1(\text{jonathan}, \text{katharina})$ .  
F38:  $r45(\text{katharina}, \text{jonathan})$ .  
F39:  $r1(\text{jonathan}, \text{adam})$ .  
F40:  $r45(\text{adam}, \text{jonathan})$ .  
F41:  $r1(\text{valentina}, \text{nora})$ .  
F42:  $r45(\text{nora}, \text{valentina})$ .  
F43:  $r1(\text{valentina}, \text{emil})$ .  
F44:  $r45(\text{emil}, \text{valentina})$ .  
F45:  $r1(\text{stefan}, \text{nora})$ .  
F46:  $r45(\text{nora}, \text{stefan})$ .  
F47:  $r1(\text{stefan}, \text{emil})$ .  
F48:  $r45(\text{emil}, \text{stefan})$ .  
F49:  $r1(\text{selina}, \text{nico})$ .  
F50:  $r45(\text{nico}, \text{selina})$ .  
F51:  $r1(\text{selina}, \text{jonas})$ .  
F52:  $r45(\text{jonas}, \text{selina})$ .  
F53:  $r1(\text{selina}, \text{stefan})$ .  
F54:  $r45(\text{stefan}, \text{selina})$ .  
F55:  $r1(\text{marko}, \text{nico})$ .  
F56:  $r45(\text{nico}, \text{marko})$ .  
F57:  $r1(\text{marko}, \text{jonas})$ .  
F58:  $r45(\text{jonas}, \text{marko})$ .  
F59:  $r1(\text{marko}, \text{stefan})$ .  
F60:  $r45(\text{stefan}, \text{marko})$ .  
F61:  $r1(\text{helga}, \text{selina})$ .  
F62:  $r45(\text{selina}, \text{helga})$ .  
F63:  $r1(\text{simon}, \text{selina})$ .  
F64:  $r45(\text{selina}, \text{simon})$ .  
F65:  $r43(\text{michael})$ .  
F66:  $r44(\text{angelina})$ .  
F67:  $r43(\text{emil})$ .

F68:  $r43(\text{jonathan})$ .

F69:  $r44(\text{valentina})$ .

F70:  $r43(\text{stefan})$ .

F71:  $r44(\text{selina})$ .

F72:  $r43(\text{marko})$ .

F73:  $r44(\text{helga})$ .

F74:  $r43(\text{simon})$ .

F75:  $r44(\text{emily})$ .

F76:  $r44(\text{katharina})$ .

F77:  $r44(\text{nora})$ .

F78:  $r43(\text{jan})$ .

F79:  $r44(\text{magdalena})$ .

F80:  $r43(\text{matthias})$ .

F81:  $r43(\text{nico})$ .

F82:  $r43(\text{adam})$ .

F83:  $r44(\text{claudia})$ .

F84:  $r43(\text{sebastian})$ .

F85:  $r44(\text{alina})$ .

F86:  $r44(\text{lea})$ .

F87:  $r43(\text{patrick})$ .

F88:  $r43(\text{theodor})$ .

F89:  $r43(\text{jonas})$ .

F90:  $r44(\text{vanessa})$ .

F91:  $r43(\text{leon})$ .

G1:  $r20(\text{katharina}, \text{theodor})$

G2:  $r20(\text{lea}, \text{theodor})$

Template:  $\forall A, B, C, D, E, F : \#\#(A, B) \wedge \#\#(B, C) \wedge \#\#(C, D) \wedge \#\#(D, E) \wedge \#\#(E, F) \wedge ++(A) \rightarrow r20(A, F)$

Note that the symbol ‘ $\#\#$ ’ in the template should be filled with either ‘ $r1$ ’ or ‘ $r45$ ’, while the symbol ‘ $++$ ’ should be filled with either ‘ $r43$ ’ or ‘ $r44$ ’. After filling in the template, the generated rule is:
